# Supplementary material for: A scoping review exploring the impact of digital systems on processes and outcomes in the care management of acute kidney injury and progress towards establishing learning healthcare systems
Source: medRxiv preprint, doi:10.1101/2021.02.23.21252060, version 1 (2021-02-25)
Supplement: Supplemental Material [file 252060_file03.docx]

# Supplemental Material 1: Search terms

Databases (Embase, PubMed, Medline, Cochrane, Scopus and Web of Science) were searched for papers published from inception to 31January 2020 using free text keywords related to our review questions. Additional articles were identified through citation searches of relevant articles and reviews.

Search terms used were:

(Acute Kidney Injury or Acute Renal Failure or Renal or AKI)

and

(Decision Support or health information exchange or hospital information system or EHR or EPR or electronic or computer* or CPOE or Surveillance or Monitoring or Detection or Management or Prevention or Prescribing or Treatment or Alert* or predictive analy* or  predictive model* or machine learning or care process models or resource utilisation or clinical workflow or referral tracking or hospital service or care models or intervention).

# Supplemental Material 2: Summary of the 43 studies included in the scoping review

**Table S1: Summary of 43 studies included in the scoping review**

| **Surname** *et al* Country^citation number | **Population & Setting** | **Intervention** |
| --- | --- | --- |
| Aiyegbusi et al UK (Scotland) (2018)[1] | All primary care in NHS Tayside region | AKI identified in primary care (PC-AKI) through AKI e-alerts |
| Al-Jaghbeer et al USA (2018)[2] | 14 hospitals in a health care system | Clinical decision support system in hospital |
| Awdishu et al USA (2016)[3] | Tertiary healthcare hospital and ambulatory care system | Clinical decision support tool developed for 20 nephrotoxic medications |
| Bhardwaja et al USA (2011)[4] | Single large integrated health care delivery system (Kaiser Permanente Colorado) | Use of pharmacy alert system to reduce medication errors in renal insufficiency |
| Chandrasekar et al UK (2017)[5] | Acute hospital admissions | Whole system quality improvement approach |
| Chertow et al USA (2001)[6] | Urban tertiary care teaching hospital | Computerised decision support for prescribing in patients with renal insufficiency |
| Cho et al Republic of Korea (2012)[7] | Teaching hospital | Computer alert for risk of contrast-induced AKI and recommendation for prophylaxis |
| Choi et al Republic of Korea (2019)[8] | Hospital patients with eGFR less than 50 | Designated pharmacist in addition to computerised alerts |
| Colpaert et al Belgium (2012)[9] | Tertiary Hospital | Introduction of real-time electronic alert system to improve management and severity of AKI |
| Connell et al UK (2019)[10] | A large hospital | A digitally enabled care pathway comprising automated AKI detection, mobile clinician notification, in-app triage, and a protocolised specialist clinical response. |
| Connell et al UK (2019)[11] | ED departments in single tertiary hospital (intervention) vs single district hospital (control) | Multicomponent intervention (alert system, AKI response team and care protocol) to improve the outcomes from AKI |
| Connell et al UK (2019)[12] | Tertiary care hospital | Mobile results viewing in a digitally enabled care pathway |
| Desmedt et al Belgium (2018)[13] | Academic hospital (non-ED or ICU patients) | Computerised decision support for dosing adjustments for 85 drugs |
| Díaz et al Spain (2013)[14] | Teaching hospital | A system for drug dosage adjustment integrated into the hospital computer provider order entry system |
| Evans et al USA (1999)[15] | Tertiary care centre | Computer-assisted antibiotic dose monitor |
| Galanter et al USA (2005)[16] | Single teaching hospital | Automated alerts designed to reduce the use of contraindicated drugs in patients with renal insufficiency |
| Goldstein et al USA (2013)[17] | Single quaternary paediatric hospital | Pharmacist screen for nephrotoxic load and recommendations for serum creatinine testing made |
| Goldstein et al USA (2016)[18] | Children noncritical care unit | Pharmacist recommended monitoring and dosing after electronic trigger |
| Heringa et al Netherland (2017)[19] | Community pharmacies | CDSS with optional point of care testing |
| Hodgson et al UK (2018)[20] | 2 non-specialist hospitals | Electronic clinical prediction rule combined with an AKI e-alert |
| Kolhe et al UK (2015)[21] | Tertiary care centre | A care bundle with interruptive alert |
| Kolhe et al UK (2016)[22] | Single teaching hospital | AKI care bundle with interruptive alert |
| Kothari et al USA (2018)[23] | 8 New York hospitals | Daily laboratory alerting of patients at risk for AKI |
| Leung et al USA (2013)[24] | 5 Community Hospitals | Comparison of different intensities of clinical decision support within EHR computer order physician entry |
| Matsumura et al Japan (2009)[25] | Single hospital | Development of EHR e-alert system for evaluating renal function and checking doses of medication according to the patient's renal function |
| McCoy et al USA (2010)[26] | Academic tertiary care hospital | Computerised order entry alerts: passive alert for increasing creatinine and interruptive alert for medication adjustment |
| Nash et al USA (2005)[27] | Teaching hospital | An automated system to complement an existing computerized order entry system by detecting the administration of excessive doses of medication |
| Park et al Korea (2018)[28] | Tertiary teaching hospital | AKI alert system that provides option for automated consultation requests to the nephrology division |
| Porter et al UK (2014)[29] | Teaching hospital | Real-time alert to detect AKI |
| Ralph et al USA (2014)[30] | Tertiary hospital | Pharmacist-run CDSS alert based on early serum creatinine |
| Rind et al USA (1994)[31] | Teaching hospital | Computer-based alerts for hospitalised patients |
| Roberts et al Australia (2010)[32] | Teaching hospital | CDSS in an environment independent of computerised provider order entry introduced to prescribers via academic detailing |
| Selby et al UK (2019)[33] | 5 hospitals | Multi-faceted intervention programme (AKI e-alerts, an AKI care bundle, and an education program) to improve outcomes associated with AKI |
| Sellier et al France (2009)[34] | 2 departments in a teaching hospital | Alert at time of ordering medication in computerised provider order entry system to decrease inappropriate prescriptions |
| Sykes et al UK (2018)[35] | Single teaching hospital | Whole system approach quality improvement to reduce AKI and its impact (e-learning package, AKI bundle, enhanced pharmacy medicines reconciliation, QI nurses, safety huddles, supporting literature, champions) |
| Thomas et al UK (2015)[36] | 2 acute hospitals and a community service | AKI outreach service |
| Tollitt et al UK (2018)[37] | 46 primary care practices | AKI e-alert and AKI educational outreach sessions |
| Van Driest et al USA (2020)[38] | Teaching hospital | Implementation of AKI risk alerts to promote increased uptake of serum creatinine screening of patients |
| Vogel et al USA (2016)[39] | Integrated health care delivery system (Kaiser Permanente Colorado) | Pharmacy and physician facing e-alert system linked to prescribing |
| West Midlands Acute Medicine Collaborative et al UK (2019)[40] | Acute medical units in 14 hospital sites | UK National Health Service AKI e-alert system |
| Wilson et al USA (2015)[41] | Tertiary Hospital | Use of automated e-alert to reduce severity of AKI injury and improve outcomes |
| Wong et al USA (2017)[42] | Urban tertiary care hospital ICU | Computerised decision support including to support safe drug use in renal insufficiency |
| Wu et al China (2018)[43] | Hospital ICUs and high-risk cardiovascular wards | AKI e-alert on high-risk wards |
| AKI, acute kidney injury; PC-AKI, primary care acute kidney injury; GFR, glomerular filtration rate; ED, emergency department; ICU, intensive care unit; EHR, electronic health system; CDSS, clinical decision support system. | | |

## References

1 Aiyegbusi O, Witham MD, Lim M, *et al.* Impact of introducing electronic acute kidney injury alerts in primary care. *Clin Kidney J* 2018;**12**:253–7. doi:10.1093/ckj/sfy083

2 Al-Jaghbeer M, Dealmeida D, Bilderback A, *et al.* Clinical Decision Support for In-Hospital AKI. *J Am Soc Nephrol* 2018;**29**:654–60. doi:10.1681/ASN.2017070765

3 Awdishu L, Coates CR, Lyddane A, *et al.* The impact of real-time alerting on appropriate prescribing in kidney disease: A cluster randomized controlled trial. *J Am Med Informatics Assoc* 2016;**23**:609–16. doi:10.1093/jamia/ocv159

4 Bhardwaja B, Carroll NM, Raebel MA, *et al.* Improving Prescribing Safety in Patients with Renal Insufficiency in the Ambulatory Setting: The Drug Renal Alert Pharmacy (DRAP) Program. *Pharmacotherapy* 2011;**31**:346–56. doi:10.1592/phco.31.4.346

5 Chandrasekar T, Sharma A, Tennent L, *et al.* A whole system approach to improving mortality associated with acute kidney injury. *QJM An Int J Med* 2017;**110**:657–66. doi:10.1093/QJMED/HCX101

6 Chertow GM, Lee J, Kuperman GJ, *et al.* Guided Medication Dosing for Inpatients With Renal Insufficiency. *JAMA* 2001;**286**:2839–44. doi:10.1001/jama.286.22.2839

7 Cho Aj, Lee JE, Yoon JY, *et al.* Effect of an Electronic Alert on Risk of Contrast-Induced Acute Kidney Injury in Hospitalized Patients Undergoing Computed Tomography. *Am J Kidney Dis* 2012;**60**:74–81. doi:10.1053/j.ajkd.2012.02.331

8 Choi KS, Lee E, Rhie SJ. Impact of pharmacists’ interventions on physicians’ decision of a knowledge-based renal dosage adjustment system. *Int J Clin Pharm* 2019;**41**:424–33. doi:10.1007/s11096-019-00796-5

9 Colpaert K, Hoste EA, Steurbaut K, *et al.* Impact of real-time electronic alerting of acute kidney injury on therapeutic intervention and progression of RIFLE class. *Crit Care Med* 2012;**40**:1164–70. doi:10.1097/CCM.0b013e3182387a6b

10 Connell A, Raine R, Martin P, *et al.* Implementation of a Digitally Enabled Care Pathway (Part 1): Impact on Clinical Outcomes and Associated Health Care Costs. *J Med Internet Res* 2019;**21**:e13147. doi:10.2196/13147

11 Connell A, Montgomery H, Martin P, *et al.* Evaluation of a digitally-enabled care pathway for acute kidney injury management in hospital emergency admissions. *npj Digit Med* 2019;**2**:67. doi:10.1038/s41746-019-0100-6

12 Connell A, Black G, Montgomery H, *et al.* Implementation of a Digitally Enabled Care Pathway (Part 2): Qualitative Analysis of Experiences of Health Care Professionals. *J Med Internet Res* 2019;**21**:e13143. doi:10.2196/13143

13 Desmedt S, Spinewine A, Jadoul M, *et al.* Impact of a clinical decision support system for drug dosage in patients with renal failure. *Int J Clin Pharm* 2018;**40**:1225–33. doi:10.1007/s11096-018-0612-1

14 Díaz AS, de la Fuente JS, Esteva L, *et al.* Drug prescribing in patients with renal impairment optimized by a computer-based, semi-automated system. *Int J Clin Pharm* 2013;**35**:1170–7. doi:10.1007/s11096-013-9843-3

15 Evans RS, Pestotnik SL, Classen DC, *et al.* Evaluation of a computer-assisted antibiotic-dose monitor. *Ann Pharmacother* 1999;**33**:1026–31. doi:10.1345/aph.18391

16 Galanter WL, Didomenico RJ, Polikaitis A. A Trial of Automated Decision Support Alerts for Contraindicated Medications Using Computerized Physician Order Entry. *J Am Med Informatics Assoc* 2005;**12**:269–74. doi:10.1197/jamia.M1727

17 Goldstein SL, Kirkendall E, Nguyen H, *et al.* Electronic Health Record Identification of Nephrotoxin Exposure and Associated Acute Kidney Injury. *Pediatrics* 2013;**132**:e756–e767. doi:10.1542/peds.2013-0794

18 Goldstein SL, Mottes T, Simpson K, *et al.* A sustained quality improvement program reduces nephrotoxic medication-associated acute kidney injury. *Kidney Int* 2016;**90**:212–21. doi:10.1016/j.kint.2016.03.031

19 Heringa M, Floor-Schreudering A, De Smet PAGM, *et al.* Clinical Decision Support and Optional Point of Care Testing of Renal Function for Safe Use of Antibiotics in Elderly Patients: A Retrospective Study in Community Pharmacy Practice. *Drugs and Aging* 2017;**34**:851–8. doi:10.1007/s40266-017-0497-z

20 Hodgson LE, Roderick PJ, Venn RM, *et al.* The ICE-AKI study: Impact analysis of a Clinical prediction rule and Electronic AKI alert in general medical patients. *PLoS One* 2018;**13**:e0200584. doi:10.1371/journal.pone.0200584

21 Kolhe N V, Staples D, Reilly T, *et al.* Impact of Compliance with a Care Bundle on Acute Kidney Injury Outcomes: A Prospective Observational Study. *PLoS One* 2015;**10**:e0132279. doi:10.1371/journal.pone.0132279

22 Kolhe N V., Reilly T, Leung J, *et al.* A simple care bundle for use in acute kidney injury: a propensity score-matched cohort study. *Nephrol Dial Transplant* 2016;**31**:1846–54. doi:10.1093/ndt/gfw087

23 Kothari T, Jensen K, Mallon D, *et al.* Impact of Daily Electronic Laboratory Alerting on Early Detection and Clinical Documentation of Acute Kidney Injury in Hospital Settings. *Acad Pathol* 2018;**5**:1–10. doi:10.1177/2374289518816502

24 Leung AA, Schiff G, Keohane C, *et al.* Impact of vendor computerized physician order entry on patients with renal impairment in community hospitals. *J Hosp Med* 2013;**8**:545–52. doi:10.1002/jhm.2072

25 Matsumura Y, Yamaguchi T, Hasegawa H, *et al.* Alert System for Inappropriate Prescriptions Relating to Patients’ Clinical Condition. *Methods Inf Med* 2009;**48**:566–73. doi:10.3414/ME9244

26 McCoy AB, Waitman LR, Gadd CS, *et al.* A Computerized Provider Order Entry Intervention for Medication Safety During Acute Kidney Injury: A Quality Improvement Report. *Am J Kidney Dis* 2010;**56**:832–41. doi:10.1053/j.ajkd.2010.05.024

27 Nash IS, Rojas M, Hebert P, *et al.* Reducing excessive medication administration in hospitalized adults with renal dysfunction. *Am J Med Qual* 2005;**20**:64–9. doi:10.1177/1062860604273752

28 Park S, Baek SH, Ahn S, *et al.* Impact of Electronic Acute Kidney Injury (AKI) Alerts With Automated Nephrologist Consultation on Detection and Severity of AKI: A Quality Improvement Study. *Am J Kidney Dis* 2018;**71**:9–19. doi:10.1053/j.ajkd.2017.06.008

29 Porter CJ, Juurlink I, Bisset LH, *et al.* A real-time electronic alert to improve detection of acute kidney injury in a large teaching hospital. *Nephrol Dial Transplant* 2014;**29**:1888–93. doi:10.1093/ndt/gfu082

30 Ralph R, Patel JA, Postelnick M, *et al.* Use of a clinical decision support system alert to prevent supratherapeutic vancomycin concentrations. *J Pharm Technol* 2014;**30**:175–8. doi:10.1177/8755122514544127

31 Rind DM, Safran C, Phillips RS, *et al.* Effect of Computer-Based Alerts on the Treatment and Outcomes of Hospitalized Patients. *Arch Intern Med* 1994;**154**:1511–7. doi:10.1001/archinte.1994.00420130107014

32 Roberts GW, Farmer CJ, Cheney PC, *et al.* Clinical decision support implemented with academic detailing improves prescribing of key renally cleared drugs in the hospital setting. *J Am Med Informatics Assoc* 2010;**17**:308–12. doi:10.1136/jamia.2009.001537

33 Selby NM, Casula A, Lamming L, *et al.* An organizational-level program of intervention for AKI: A pragmatic stepped wedge cluster randomized trial. *J Am Soc Nephrol* 2019;**30**:505–15. doi:10.1681/ASN.2018090886

34 Sellier E, Colombet I, Sabatier B, *et al.* Effect of Alerts for Drug Dosage Adjustment in Inpatients with Renal Insufficiency. *J Am Med Informatics Assoc* 2009;**16**:203–10. doi:10.1197/jamia.M2805

35 Sykes L, Sinha S, Hegarty J, *et al.* Reducing acute kidney injury incidence and progression in a large teaching hospital. *BMJ Open Qual* 2018;**7**:e000308. doi:10.1136/bmjoq-2017-000308

36 Thomas ME, Sitch A, Baharani J, *et al.* Earlier intervention for acute kidney injury: evaluation of an outreach service and a long-term follow-up. *Nephrol Dial Transplant* 2015;**30**:239–44. doi:10.1093/ndt/gfu316

37 Tollitt J, Flanagan E, McCorkindale S, *et al.* Improved management of acute kidney injury in primary care using e-alerts and an educational outreach programme. *Fam Pract* 2018;**35**:684–9. doi:10.1093/fampra/cmy030

38 Van Driest SL, Wang L, McLemore MF, *et al.* Acute kidney injury risk-based screening in pediatric inpatients: A pragmatic randomized trial. *Pediatr Res* 2020;**87**:118–24. doi:10.1038/s41390-019-0550-1

39 Vogel EA, Billups SJ, Herner SJ, *et al.* Renal drug dosing: Effectiveness of outpatient pharmacist-based vs. prescriber-based clinical decision support systems. *Appl Clin Inform* 2016;**7**:731–44. doi:10.4338/ACI-2016-01-RA-0010

40 West Midlands Acute Medicine Collaborative. The impact of the NHS electronic-alert system on the recognition and management of acute kidney injury in acute medicine. *Clin Med* 2019;**19**:109–13. doi:10.7861/clinmedicine.19-2-109

41 Wilson FP, Shashaty M, Testani J, *et al.* Automated, electronic alerts for acute kidney injury: A single-blind, parallel-group, randomised controlled trial. *Lancet* 2015;**385**:1966–74. doi:10.1016/S0140-6736(15)60266-5

42 Wong A, Amato MG, Seger DL, *et al.* Evaluation of medication-related clinical decision support alert overrides in the intensive care unit. *J Crit Care* 2017;**39**:156–61. doi:10.1016/j.jcrc.2017.02.027

43 Wu Y, Chen Y, Li S, *et al.* Value of electronic alerts for acute kidney injury in high-risk wards: a pilot randomized controlled trial. *Int Urol Nephrol* 2018;**50**:1483–8. doi:10.1007/s11255-018-1836-7
